# Supplementary material for: Fluoxetine ameliorates depressive symptoms by regulating lncRNA expression in the mouse hippocampus
Source: PubMed Central journal article supplement — Zool Res. 2021 Jan 18;42(1):28–42. doi: 10.24272/j.issn.2095-8137.2020.294 (PMC7840451; doi:10.24272/j.issn.2095-8137.2020.294), 2021-01-18
Supplement: zr-42-1-28-S1.pdf [file zr-42-1-28-S1.pdf]

## **Supplementary Tables and Figures**

**Supplementary Table S1** Differentially expressed lncRNAs between CUMS and NOR groups

**Supplementary Table S2** Differentially expressed lncRNAs between FLU and CUMS groups

**Supplementary Table S3** A list of 95 altered expressed lncRNAs between FLU and CUMS groups as well as between CUMS and NOR groups

**Supplementary Table S4** A list of predicted mRNA targets which were co-localized with the dysregulated lncRNAs in FLU vs. CUMS and CUMS vs. NOR comparisons

**Supplementary Table S5** A list of predicted mRNA targets which were co-expressed with the dysregulated lncRNAs in FLU vs. CUMS and CUMS vs. NOR comparisons

**Supplementary Table S1-S5** are listed as separate excel files due to their large size.

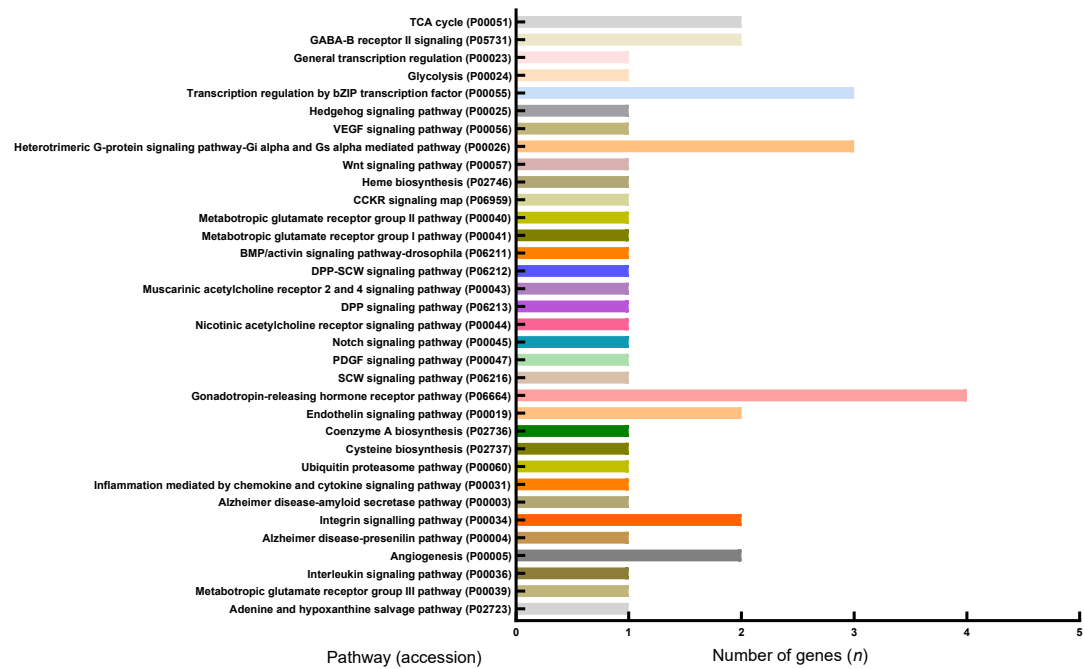

**Supplementary Figure S1** Pathways predicted based on the target genes of the differentially expressed lncRNAs *in cis* between FLU and CUMS groups ( $Q$ -value<0.05) by PATHER analysis.

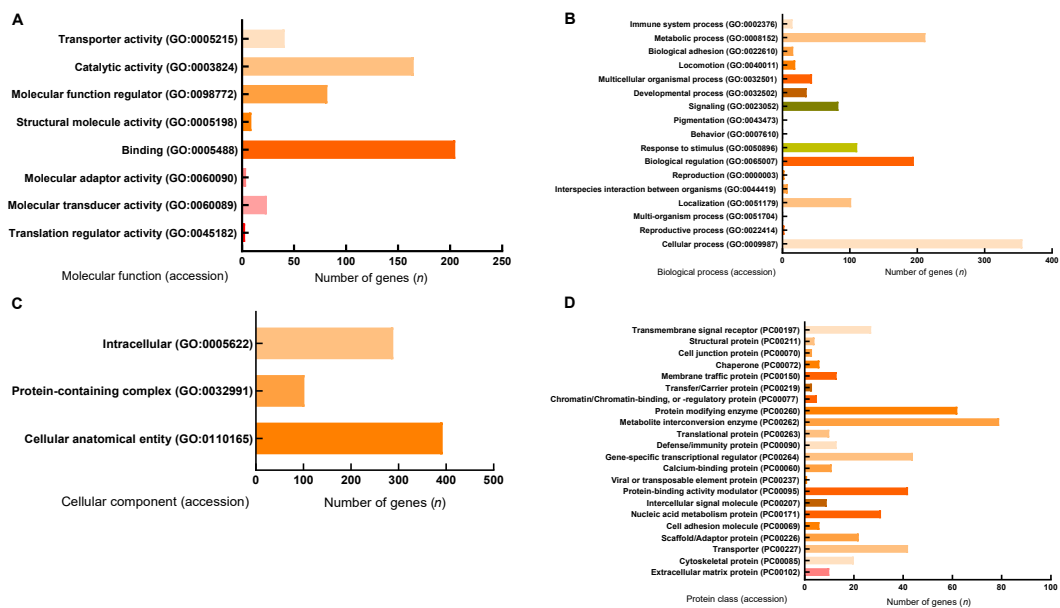

**Supplementary Figure S2** GO analyses of mRNA targets co-expressed with differentially expressed lncRNAs in a comparison of FLU and CUMS group ( $Q$ -value<0.05) based on the categories of molecular function (A), cellular component (B), biological process (C) and protein class (D).
